# Supplementary material for: Length variations within the Merle retrotransposon of canine PMEL: correlating genotype with phenotype
Source: Mob DNA. 2018 Aug 3;9:26. doi: 10.1186/s13100-018-0131-6 (PMC6091007; doi:10.1186/s13100-018-0131-6)
Supplement: Supplementary file 1 — Study population data. Breed, phenotype, and M genotypes are given for all 259 dogs in our final study cohort. Merle amplicon and inferred oligo(dT) length in base pairs are given with corresponding signal intensity (RFU) for each dog for all peaks with an RFU value of 100 or greater. D, H, and S genotypes are given for select dogs. (XLS 66 kb) [file 13100_2018_131_MOESM1_ESM.xls]

## Sheet: Sheet1
Breed	Phenotype	M Genotype	H Genotype	D Genotype	S Genotype	M1 amplicon (bp)	Peak height 1 (RFU)	M2 amplicon (bp)	Peak height 2 (RFU)	M3 amplicon (bp)	Peak height 3 (RFU)	M4 amplicon (bp)	Peak height 4 (RFU)	Inferred oligo (dT) (bp)
Australian Shepherd	Cryptic	Mm				258.93	12637							24.93
Australian Shepherd	Cryptic	Mm				268.72	9126							34.72
Australian Shepherd	Cryptic	Mm				270.36	6412							36.36
Australian Shepherd	Cryptic	Mm				270.39	6222							36.39
Shetland Sheepdog	Cryptic	Mm				272.53	2714							38.53
Australian Shepherd	Cryptic	Mm				277.21	5561							43.21
Shetland Sheepdog	Cryptic	Mm				279.3	3494							45.3
Australian Shepherd	Cryptic	Mm				282.07	4671							48.07
Collie	Cryptic	Mm				284.19	4286							50.19
Collie	Cryptic	Mm				285.04	3403							51.04
Shetland Sheepdog	Cryptic	Mm				287.89	2548							53.89
Collie	Cryptic	Mm				287.91	2262							53.91
Collie	Cryptic	Mm				287.98	3716							53.98
Collie	Cryptic	Mm				287.98	4507							53.98
Collie	Cryptic	Mm				287.98	3884							53.98
Collie	Cryptic	Mm				288.07	2845							54.07
Collie	Cryptic	Mm				288.51	1915							54.51
Shetland Sheepdog	Cryptic	Mm				289.07	4528							55.07
Shetland Sheepdog	Cryptic	Mm				289.08	2624							55.08
Border Collie	Dilute	Mm		DD		299.81	1230							65.81
Border Collie	Dilute	Mm		DD		300.78	2310							66.78
Miniature American Shepherd	Dilute	Mm		DD		301.72	692							67.72
Collie	Dilute	Mm		DD		302.31	1135							68.31
Border Collie	Dilute	Mm		DD		302.98	2093							68.98
Border Collie	Dilute	Mm		DD		303	4344							69
Australian Shepherd	Dilute	Mm		DD		304.1	1685							70.1
Australian Shepherd	Dilute	Mm		DD		304.4	3812							70.4
Collie	Dilute	Mm		DD		304.45	1969							70.45
Shetland Sheepdog	Dilute	Mm		DD		304.96	1897							70.96
Collie	Dilute	Mm		DD		305.15	1222							71.15
Border Collie	Dilute	Mm		Dd		306.21	1279							72.21
Collie	Dilute	Mm		DD		306.23	1867							72.23
Collie	Dilute	Mm		DD		306.29	2151							72.29
Collie	Dilute	Mm		DD		306.31	904							72.31
Collie	Dilute	Mm		DD		307.3	357							73.3
Border Collie	Dilute	Mm		DD		307.37	1310							73.37
Border Collie	Dilute	Mm		Dd		308.33	2010							74.33
Collie	Standard	Mm				311.6	2491	288.02	599					77.6
Collie	Standard	Mm				311.74	826							77.74
Collie	Standard	Mm				312.33	420							78.33
Australian Kelpie	Standard	Mm				312.43	1189							78.43
Collie	Standard	Mm				312.45	594							78.45
Australian Kelpie	Standard	Mm				312.46	2341							78.46
Collie	Standard	Mm				312.52	835	368.67	105					78.52
Australian Kelpie	Standard	Mm				312.52	1035	283.11	145	269.56	126			78.52
Collie	Standard	Mm				312.54	2367							78.54
Australian Shepherd	Standard	Mm				312.61	2332	274.45	555					78.61
Collie	Standard	Mm				312.61	211							78.61
Miniature American Shepherd	Standard	Mm				312.63	907							78.63
Collie	Standard	Mm				312.65	1814	271.61	186					78.65
Collie	Standard	Mm				312.65	3119	268.65	151					78.65
Collie	Standard	Mm				312.65	1751							78.65
Collie	Standard	Mm				312.7	614							78.7
Australian Shepherd	Standard	Mm				312.71	2752							78.71
Australian Shepherd	Standard	Mm				312.72	759	285.19	147	267.8	149			78.72
Shetland Sheepdog	Standard	Mm				312.72	736							78.72
Collie	Standard	Mm				312.73	1676							78.73
Shetland Sheepdog	Standard	Mm				312.73	780	269.63	729					78.73
Collie	Standard	Mm				312.77	1781							78.77
Shetland Sheepdog	Standard	Mm				312.78	2340	272.56	582					78.78
Collie	Standard	Mm				312.79	2191	270.59	141					78.79
Collie	Standard	Mm				312.81	1970	269.7	150					78.81
Collie	Standard	Mm				313.13	2233	271	109					79.13
Shetland Sheepdog	Standard	Mm				313.24	1287							79.24
Shetland Sheepdog	Standard	Mm				313.26	2236	297.14	187	274.09	144			79.26
Collie	Standard	Mm				313.53	1184							79.53
Miniature American Shepherd	Standard	Mm				313.53	875	296.75	148	275.37	126			79.53
Collie	Standard	Mm				313.55	2647							79.55
Australian Shepherd	Standard	Mm				313.56	1390							79.56
Collie	Standard	Mm				313.56	2784	273.35	273					79.56
Australian Shepherd	Standard	Mm				313.58	976							79.58
Collie	Standard	Mm				313.58	1046							79.58
Shetland Sheepdog	Standard	Mm				313.58	1834							79.58
Australian Shepherd	Standard	Mm				313.6	761	270.5	172					79.6
Collie	Standard	Mm				313.6	2699	276.38	137					79.6
Collie	Standard	Mm				313.67	2263							79.67
Collie	Standard	Mm				313.69	2320	287.05	630					79.69
Collie	Standard	Mm				313.69	1042							79.69
Shetland Sheepdog	Standard	Mm				313.69	2231	272.67	142					79.69
Shetland Sheepdog	Standard	Mm				313.73	2679							79.73
Shetland Sheepdog	Standard	Mm				313.73	2170							79.73
Shetland Sheepdog	Standard	Mm				313.73	1288							79.73
Collie	Standard	Mm				313.74	134							79.74
Shetland Sheepdog	Standard	Mm				313.75	3086	274.56	119					79.75
Australian Shepherd	Standard	Mm				313.76	858	269.7	233	258.13	152			79.76
Shetland Sheepdog	Standard	Mm				313.76	1558	260.02	251					79.76
Shetland Sheepdog	Standard	Mm				313.76	905							79.76
Shetland Sheepdog	Standard	Mm				313.76	1581							79.76
Border Collie	Standard	Mm				313.77	654							79.77
Collie	Standard	Mm				313.77	1075							79.77
Collie	Standard	Mm				313.78	1896	268.68	165					79.78
Collie	Standard	Mm				313.8	1582	269.67	100					79.8
Shetland Sheepdog	Standard	Mm				313.83	1160	288.12	200					79.83
Collie	Predominantly solid	Mm				313.84	125	285.2	1593					79.84
Shetland Sheepdog	Standard	Mm				313.84	1515	278.42	165					79.84
Shetland Sheepdog	Standard	Mm				313.84	2358	275.52	125					79.84
Collie	Standard	Mm				313.87	768	291.02	167					79.87
Australian Shepherd	Standard	Mm				313.89	571							79.89
Collie	Standard	Mm				313.91	662	274.62	105					79.91
Shetland Sheepdog	Standard	Mm				313.91	1082							79.91
Australian Shepherd	Standard	Mm				313.95	926							79.95
Collie	Standard	Mm				314.2	1138							80.2
Shetland Sheepdog	Standard	Mm				314.2	3830	288.43	397					80.2
Shetland Sheepdog	Standard	Mm				314.22	1715							80.22
Collie	Standard	Mm				314.23	2689	292.41	200	271.13	154			80.23
Collie	Standard	Mm				314.23	804							80.23
Shetland Sheepdog	Standard	Mm				314.23	1211	290.4	114	260.54	308			80.23
Shetland Sheepdog	Standard	Mm				314.24	2305							80.24
Shetland Sheepdog	Standard	Mm				314.25	2402							80.25
Shetland Sheepdog	Standard	Mm				314.25	3572							80.25
Shetland Sheepdog	Standard	Mm				314.27	1390							80.27
Shetland Sheepdog	Standard	Mm				314.28	4568							80.28
Collie	Standard	Mm				314.29	2676							80.29
Shetland Sheepdog	Standard	Mm				314.29	1697	273.11	257					80.29
Shetland Sheepdog	Standard	Mm				314.29	1098							80.29
Collie	Predominantly solid	Mm				314.3	518	258.63	9625					80.3
Collie	Standard	Mm				314.33	1673							80.33
Shetland Sheepdog	Standard	Mm				314.33	2328	293.37	126	263.5	1313			80.33
Shetland Sheepdog	Standard	Mm				314.33	2798							80.33
Collie	Standard	Mm				314.34	1076							80.34
Collie	Standard	Mm				314.37	2310							80.37
Collie	Standard	Mm				314.4	1612	276.11	136					80.4
Collie	Unclassified	Mm				314.41	749	302.32	124					80.41
Collie	Standard	Mm				314.46	979	274.22	248	268.46	195			80.46
Miniature American Shepherd	Harlequin	Mm				314.52	743							80.52
Australian Shepherd	Standard	Mm				314.56	840							80.56
Shetland Sheepdog	Standard	Mm				314.57	1191							80.57
Australian Shepherd	Standard	Mm				314.59	585	277.24	271					80.59
Australian Shepherd	Standard	Mm				314.61	610							80.61
Collie	Standard	Mm				314.61	531							80.61
Miniature American Shepherd	Predominantly solid	Mm				314.62	694	285.88	318					80.62
Australian Shepherd	Standard	Mm				314.64	822							80.64
Australian Shepherd	Standard	Mm				314.66	766	300.54	646					80.66
Australian Shepherd	Standard	Mm				314.66	1293	280.15	314					80.66
Australian Shepherd	Standard	Mm				314.66	687							80.66
Australian Shepherd	Standard	Mm				314.66	1015							80.66
Australian Shepherd	Standard	Mm				314.67	1671	271.37	262					80.67
Australian Shepherd	Standard	Mm				314.67	920							80.67
Collie	Standard	Mm				314.67	3431							80.67
Australian Shepherd	Predominantly solid	Mm				314.68	696	249.14	17535					80.68
Border Collie	Standard	Mm				314.7	1112							80.7
Australian Shepherd	Standard	Mm				314.71	838	301.72	169	236.77	211			80.71
Collie	Standard	Mm				314.71	1489							80.71
Collie	Standard	Mm				314.77	1147							80.77
Border Collie	Standard	Mm				314.78	1093							80.78
Collie	Standard	Mm				314.79	837							80.79
Collie	Standard	Mm				314.8	702	266.7	546					80.8
Australian Shepherd	Predominantly solid	Mm				314.81	372	291.01	133	275.43	383	267.71	3371	80.81
Australian Shepherd	Standard	Mm				314.81	594							80.81
Border Collie	Standard	Mm				314.83	1453							80.83
Australian Shepherd	Standard	Mm				314.85	1022							80.85
Collie	Standard	Mm				314.85	1746	263.9	116					80.85
Australian Shepherd	Standard	Mm				314.86	955							80.86
Border Collie	Standard	Mm				314.89	2546	268.75	168					80.89
Collie	Standard	Mm				314.89	1469							80.89
Collie	Standard	Mm				314.97	520							80.97
Australian Shepherd	Standard	Mm				315.03	507	278.43	136					81.03
Australian Shepherd	Standard	Mm				315.03	1144							81.03
Collie	Standard	Mm				315.06	253							81.06
Collie	Harlequin	Mm	hh		SS	315.28	2184							81.28
Collie	Standard	Mm				315.29	910							81.29
Collie	Standard	Mm				315.33	220							81.33
Australian Shepherd	Standard	Mm				315.34	1135	269.3	138	263.5	118			81.34
Shetland Sheepdog	Standard	Mm				315.38	3410	275.03	253					81.38
Collie	Standard	Mm				315.42	1072	275.98	111					81.42
Collie	Standard	Mm				315.44	2016	270.3	752					81.44
Collie	Standard	Mm				315.53	2086							81.53
Australian Shepherd	Standard	Mm				315.7	122							81.7
Australian Shepherd	Standard	Mm				315.78	1432	276.24	124					81.78
Collie	Standard	Mm				315.8	1703							81.8
Collie	Standard	Mm				315.82	1961							81.82
Shetland Sheepdog	Standard	Mm				315.86	2045	275.42	339					81.86
Collie	Harlequin	Mm	hh		SS	315.89	1887	273.45	674					81.89
Shetland Sheepdog	Standard	Mm	hh			316.44	1100	266.36	237					82.44
Shetland Sheepdog	Standard	Mm	hh			316.45	1300							82.45
Shetland Sheepdog	Standard	Mm	hh			316.53	936							82.53
Border Collie	Standard	Mm	hh			316.67	765	271.28	114					82.67
Border Collie	Standard	Mm	hh			316.72	423							82.72
Border Collie	Standard	Mm	hh			316.75	684	277.2	109	268.42	125			82.75
Border Collie	Standard	Mm	hh		SS	316.85	1942							82.85
Border Collie	Standard	Mm	hh		SS	316.9	1977	286.13	196					82.9
Border Collie	Standard	Mm	hh		SS	316.91	1742	291.99	108	270.57	128			82.91
Australian Shepherd	Standard	Mm				316.95	742	273.52	174	263.9	106			82.95
Australian Shepherd	Standard	Mm				317	612							83
Border Collie	Standard	Mm				317.04	210							83.04
Border Collie	Standard	Mm			SS	317.06	739							83.06
Australian Shepherd	Standard	Mm	hh			317.44	973							83.44
Border Collie	Standard	Mm	hh			317.45	437	277.92	364	269.22	123			83.45
Shetland Sheepdog	Standard	Mm	hh			317.5	2285							83.5
Collie	Harlequin	Mm	hh		SS	317.89	881							83.89
Shetland Sheepdog	Harlequin	Mm	hh		SS	317.99	808	285.06	239					83.99
Collie	Harlequin	Mm	hh		SS	318.03	1115							84.03
Shetland Sheepdog	Standard	Mm	hh		Ssp	318.06	3793							84.06
Australian Shepherd	Predominantly solid	Mm	hh		SS	318.11	943	274.49	338	259.1	237			84.11
Shetland Sheepdog	Standard	Mm	hh		SS	318.16	844	271.69	108					84.16
Collie	Harlequin	Mm	hh		SS	318.19	2584							84.19
Australian Shepherd	Standard	Mm	hh			318.52	2540	277.88	218	268.21	176			84.52
Shetland Sheepdog	Standard	Mm	hh			318.57	1503	274.08	238	266.36	200			84.57
Australian Shepherd	Standard	Mm	hh			318.58	2070	293.35	155	266.25	121			84.58
Shetland Sheepdog	Standard	Mm	hh		SS	318.6	2732							84.6
Shetland Sheepdog	Standard	Mm	hh		SS	318.63	2005	268.29	286					84.63
Collie	Harlequin	Mm	hh		Ssp	318.63	1687	268.26	246					84.63
Shetland Sheepdog	Standard	Mm	hh			318.65	1676	279.88	188	271.17	144			84.65
Shetland Sheepdog	Standard	Mm	hh			318.81	783							84.81
Shetland Sheepdog	Standard	Mm	hh			318.83	505	252.96	197					84.83
Collie	Harlequin	Mm	hh		SS	318.89	702							84.89
Collie	Harlequin	Mm	hh		Ssp	319.05	1229							85.05
Shetland Sheepdog	Standard	Mm	hh		SS	319.09	521							85.09
Shetland Sheepdog	Standard	Mm	hh		SS	319.11	1032							85.11
Collie	Standard	Mm				319.11	1352	281	213	268.68	326			85.11
Shetland Sheepdog	Harlequin	Mm	hh		SS	319.12	1170							85.12
Cardigan Welsh Corgi	Harlequin	Mm	hh		SS	319.13	782							85.13
Shetland Sheepdog	Unclassified	Mm	hh		SS	319.16	1138							85.16
Collie	Standard	Mm	hh		SS	319.17	1369							85.17
Shetland Sheepdog	Unclassified	Mm	hh		SS	319.17	2589							85.17
Shetland Sheepdog	Unclassified	Mm			SS	319.18	301							85.18
Collie	Harlequin	Mm	hh		SS	319.19	1922	266.8	161					85.19
Australian Shepherd	Predominantly solid	Mm				319.26	2245	280.41	189	272.64	195			85.26
Shetland Sheepdog	Standard	Mm	hh		SS	319.28	1282	269.82	156					85.28
Shetland Sheepdog	Unclassified	Mm	hh		SS	319.35	1217							85.35
Shetland Sheepdog	Standard	Mm	hh			319.54	2595	269.16	228					85.54
Shetland Sheepdog	Standard	Mm	hh			319.62	970	295.33	257					85.62
Shetland Sheepdog	Predominantly solid	Mm	hh			319.63	1757	292.39	126	281.84	222	265.49	107	85.63
Shetland Sheepdog	Standard	Mm	hh			319.64	2871							85.64
Shetland Sheepdog	Unclassified	Mm	hh		Ssp	319.65	1385	253.81	301					85.65
Shetland Sheepdog	Predominantly solid	Mm	hh			319.65	1650	297.16	280	282.77	668			85.65
Collie	Harlequin	Mm	hh		SS	319.67	799	263.44	215					85.67
Collie	Predominantly solid	Mm	hh		SS	319.71	1214	282.69	135	273.98	119	266.35	110	85.71
Collie	Harlequin	Mm	hh		Ssp	319.88	414	288.87	101					85.88
Collie	Harlequin	Mm	hh		SS	319.93	1516	270.41	240					85.93
Collie	Unclassified	Mm	hh		SS	320.08	787							86.08
Collie	Harlequin	Mm	hh		SS	320.16	1582	279.3	214					86.16
Collie	Unclassified	Mm	hh		SS	320.2	1262	276.28	119					86.2
Collie	Harlequin	Mm	hh		SS	320.23	1282	297.77	151	285.15	119			86.23
Collie	Harlequin	Mm	hh		Ssp	320.24	1807	264.89	350					86.24
Shetland Sheepdog	Harlequin	Mm	hh		SS	320.25	1210	258.17	132					86.25
Collie	Predominantly solid	Mm				320.29	1877	252.32	7349					86.29
Collie	Harlequin	Mm	hh		SS	320.3	991							86.3
Australian Shepherd	Harlequin	Mm	hh		SS	321.15	965							87.15
Collie	Harlequin	Mm	hh		SS	321.26	1568	277.37	304					87.26
Collie	Harlequin	Mm	hh		SS	321.3	1236							87.3
Collie	Harlequin	Mm	hh		SS	321.45	1220							87.45
Collie	Harlequin	Mm	hh		SS	321.5	898							87.5
Border Collie	Harlequin	Mm	hh		SS	321.81	996							87.81
Border Collie	Harlequin	Mm	hh		SS	321.95	719	271.44	347					87.95
Cardigan Welsh Corgi	Harlequin	Mm	hh		SS	322.11	1061	274.41	184					88.11
Cardigan Welsh Corgi	Harlequin	Mm	hh		SS	322.13	875							88.13
Cardigan Welsh Corgi	Harlequin	Mm	hh		SS	322.19	935							88.19
Shetland Sheepdog	Harlequin	Mm	hh		SS	324.01	1884							90.01
Shetland Sheepdog	Harlequin	Mm	hh		SS	324.28	1863	258.9	451					90.28
Shetland Sheepdog	Harlequin	Mm	hh		SS	324.66	1704	307.38	134					90.66
Collie	Harlequin	Mm	hh		SS	325.19	312	263.56	147					91.19
Collie	Harlequin	Mm	hh		SS	325.21	187	270.35	180					91.21
Collie	Harlequin	Mm	hh		SS	325.21	336							91.21
Collie	Harlequin	Mm	hh		SS	325.26	179							91.26
Collie	Harlequin	Mm	hh		SS	325.71	890	268.78	114					91.71
Collie	Harlequin	Mm	hh		SS	325.75	918	253.44	136					91.75
Collie	Predominantly solid	Mm	hh		SS	338.25	530	315.79	120	268.59	182	262.82	582	104.25
Collie	Harlequin	Mm	hh		SS	338.54	496							104.54
