# Supplementary material for: Length variations within the Merle retrotransposon of canine PMEL: correlating genotype with phenotype
Source: Mob DNA. 2018 Aug 3;9:26. doi: 10.1186/s13100-018-0131-6 (PMC6091007; doi:10.1186/s13100-018-0131-6)
Supplement: Supplementary file 2 — Technical replicates data. Merle amplicon size in base pairs is given with corresponding signal intensity (RFU) for each technical replicate. (XLS 29 kb) [file 13100_2018_131_MOESM2_ESM.xls]

## Sheet: Sheet1
Replicate ID	Merle amplicon (bp)	Peak height (RFU)
Cryptic 1	287.98	4507
Cryptic 2	287.87	2931
Cryptic 3	287.88	2392
Cryptic 4	287.87	3513
Cryptic 5	287.87	3984
Cryptic 6	287.92	3806
Cryptic 7	287.85	4824
Cryptic 8	287.92	3821
Cryptic 9	287.85	2290
Cryptic 10	287.87	3131
Cryptic 11	287.85	2733
Dilute 1	303	4344
Dilute 2	302.8	1599
Dilute 3	302.82	1484
Dilute 4	302.74	1849
Dilute 5	302.71	1938
Dilute 6	302.81	1689
Dilute 7	302.72	1256
Dilute 8	302.71	1899
Dilute 9	302.81	1468
Standard 1	314.29	2676
Standard 2	313.6	1402
Standard 3	313.58	2043
Standard 4	313.6	2237
Standard 5	313.62	1709
Standard 6	313.65	987
Standard 7	313.67	1822
Standard 8	313.45	1595
Standard 9	313.49	742
Standard 10	313.49	1531
Standard 11	313.65	1055
Harlequin 1	324.66	1704
Harlequin 2	324.27	904
Harlequin 3	324.32	773
Harlequin 4	324.25	1207
Harlequin 5	324.21	1166
Harlequin 6	324.39	666
Harlequin 7	324.27	794
Harlequin 8	323.34	372
Harlequin 9	324.3	734
Harlequin 10	324.37	739
